# Supplementary material for: Long-Lasting Hippocampal Synaptic Protein Loss in a Mouse Model of Posttraumatic Stress Disorder
Source: PubMed Central journal article supplement (PMC3416820; doi:10.1371/journal.pone.0042603), 2012-08-10

Figure S1

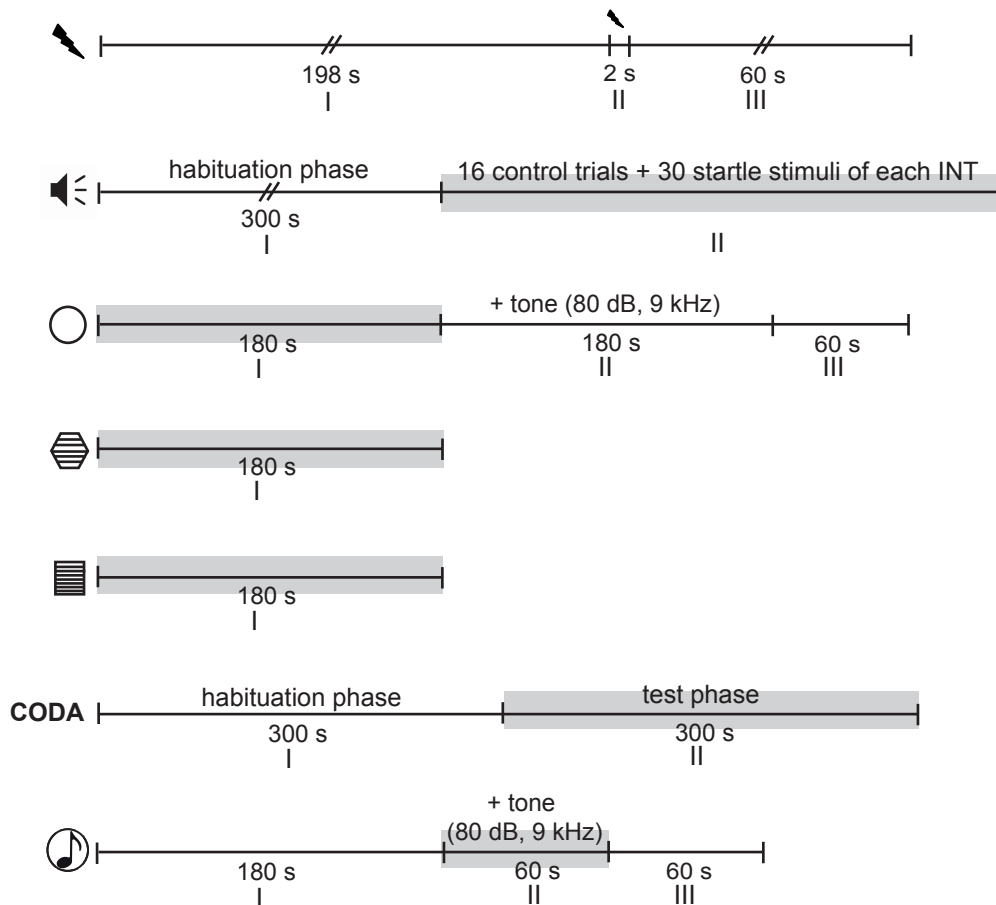

Supplement: pone.0042603.s001.pdf [file pone.0042603.s001.pdf]
